# Supplementary material for: Cancer Stemness in Apc- vs. Apc/KRAS-Driven Intestinal Tumorigenesis
Source: PLoS One. 2013 Sep 17;8(9):e73872. doi: 10.1371/journal.pone.0073872 (PMC3775784; doi:10.1371/journal.pone.0073872)
Supplement: Table S6 — Gene Ontology (GO) Analysis of the P3/intersection signature (see Supp. Table 5). Within Biobase/Explain, the Functional Analysis module enables to explore statistically overrepresented and underrepresented groups in a data set according to Gene Ontology classification (19). Matched terms of the selected Function category are given in each row of the output table. The table presents (from left to right) the GO identifier, Gene symbols, the GO term description, the number of hits from the input set to the ontology group, the size of the group in the database, expected hits, and the P-value of the observation. (XLS) [file pone.0073872.s010.xls]

## Sheet: Sheet1
Supplementary Table 6
GO Identifier	Gene symbol	GO Term	#Hits in group	Group size	#Hits expected	p-value
GO:0048407	Col1a1, Col1a2, Col3a1, Col4a1, Col5a1, Col6a1, Pdgfra	platelet-derived growth factor binding	7	9	1	1.53619e-10
GO:0019838	Col1a1, Col1a2, Col3a1, Col4a1, Col5a1, Col6a1, Fgfbp1, Htra1, Igfbp1, Igfbp5, ...	growth factor binding	14	62	2	1.79406e-10
GO:0005201	Col1a1, Col1a2, Col3a1, Col4a1, Col4a2, Col5a1, Col5a2, Emilin1, Fbn1	extracellular matrix structural constituent	9	24	1	2.36062e-09
GO:0005509	Abp1, Anxa10, Anxa13, Anxa8, Camk1d, Cblb, Cdh13, Cdh2, Clca3, Cubn, ...	calcium ion binding	47	831	20	4.85209e-08
GO:0001871	A930038C07Rik, Abp1, Bgn, Ccdc80, Col5a1, Crispld2, Dcn, Enpp2, Gm106, Lpl, ...	pattern binding	13	114	3	3.61694e-06
GO:0030247	A930038C07Rik, Abp1, Bgn, Ccdc80, Col5a1, Crispld2, Dcn, Enpp2, Gm106, Lpl, ...	polysaccharide binding	13	114	3	3.61694e-06
GO:0030246	A930038C07Rik, Abp1, Bgn, Ccdc80, Cd302, Clec2h, Col5a1, Crispld2, Dcn, Enpp2, ...	carbohydrate binding	22	304	8	4.82815e-06
GO:0050840	Bgn, Dcn, Nid1, Sparc, Spock2, Tgfbi	extracellular matrix binding	6	23	1	1.33592e-05
GO:0016641	Abp1, Lox, Loxl1, Loxl2, Maoa	oxidoreductase activity, acting on the CH-NH2 grou	5	15	1	1.93819e-05
GO:0005539	A930038C07Rik, Abp1, Bgn, Ccdc80, Col5a1, Crispld2, Dcn, Lpl, Nav2, Serpine2, ...	glycosaminoglycan binding	11	100	3	2.85121e-05
GO:0016638	Abp1, Lox, Loxl1, Loxl2, Maoa	oxidoreductase activity, acting on the CH-NH2 grou	5	18	1	5.20942e-05
GO:0004062	Sult1b1, Sult1c2, Sult1d1	aryl sulfotransferase activity	3	5	1	0.000133413
GO:0005507	Abp1, Alb, F5, Lox, Loxl1, Loxl2, Sparc	copper ion binding	7	54	2	0.000296632
GO:0008201	A930038C07Rik, Abp1, Ccdc80, Col5a1, Crispld2, Lpl, Nav2, Serpine2	heparin binding	8	73	2	0.000360317
GO:0004867	Mug1, Serpina3n, Serpinb11, Serpinb1a, Serpine2, Serpinf1, Serping1, Serpinh1, Spink4	serine-type endopeptidase inhibitor activity	9	92	3	0.000369971
GO:0030414	C3, Mug1, Serpina3n, Serpinb11, Serpinb1a, Serpine2, Serpinf1, Serping1, Serpinh1, Spink4, ...	peptidase inhibitor activity	11	135	4	0.000425443
GO:0005488	9030623C06Rik, A930038C07Rik, Abat, Abcc3, Abcc4, Abcc9, Abcg2, Abcg5, Abi2, Abp1, ...	binding	286	10511	253	0.000588537
GO:0004175	Adamdec1, Adamts2, Capn6, Casp1, Ctsc, Ctsk, Ctss, Gm131, Hp, Htra1, ...	endopeptidase activity	19	341	9	0.000640579
GO:0004091	Aadac, Bche, Ces3, Ces5, Ces6, Lpl, Pla2g12b, Pla2g2a, Pnliprp2	carboxylesterase activity	9	103	3	0.000847871
GO:0004197	Capn6, Casp1, Ctsc, Ctsk, Ctss, Pycard	cysteine-type endopeptidase activity	6	48	2	0.000977507
GO:0004857	C3, Cdkn1c, Mug1, Serpina3n, Serpinb11, Serpinb1a, Serpine2, Serpinf1, Serping1, Serpinh1, ...	enzyme inhibitor activity	13	197	5	0.000998641
GO:0004866	C3, Mug1, Serpina3n, Serpinb11, Serpinb1a, Serpine2, Serpinf1, Serping1, Serpinh1, Spink4	endopeptidase inhibitor activity	10	127	4	0.00100198
GO:0005520	Htra1, Igfbp1, Igfbp5, Igfbp7	insulin-like growth factor binding	4	20	1	0.00117896
GO:0005044	Dmbt1, Enpp2, Gm106, Loxl2, Prss12	scavenger receptor activity	5	36	1	0.00160552
GO:0008009	Ccl11, Ccl25, Ccl28, Ccl9, Cxcl12	chemokine activity	5	36	1	0.00160552
GO:0005102	Areg, Arnt2, Bmp7, Cadm1, Ccl11, Ccl25, Ccl28, Ccl9, Cxcl12, Dner, ...	receptor binding	27	607	15	0.00169555
GO:0042379	Ccl11, Ccl25, Ccl28, Ccl9, Cxcl12	chemokine receptor binding	5	37	1	0.00182023
GO:0008289	Abat, Alb, Anxa10, Anxa13, Anxa8, Apoa1, Fabp1, Fabp2, Gm1006, Gpt2, ...	lipid binding	18	347	9	0.00195941
GO:0004222	Adamdec1, Adamts2, Mep1b, Mmp10, Mmp13, Mmp2, Mmp3, Mmp7	metalloendopeptidase activity	8	99	3	0.00267269
GO:0004364	Gsta2, Gstm3, Gstm5, Mgst3	glutathione transferase activity	4	25	1	0.0027995
GO:0046332	Col1a2, Col3a1, Col5a2	SMAD binding	3	13	1	0.00330478
GO:0008237	Adamdec1, Adamts2, Cpn1, Dpep1, Enpep, Mep1b, Mmp10, Mmp13, Mmp2, Mmp3, ...	metallopeptidase activity	11	174	5	0.00332789
GO:0003846	Dgat1, Mogat2	2-acylglycerol O-acyltransferase activity	2	4	1	0.00335553
GO:0005125	Areg, Bmp7, Ccl11, Ccl25, Ccl28, Ccl9, Cxcl12, Gdf10, Grem1, Il6, ...	cytokine activity	11	177	5	0.00378997
GO:0016787	Aadac, Abcc3, Abcc9, Abcg2, Abcg5, Acpp, Adamdec1, Adamts2, Alpi, Ang4, ...	hydrolase activity	68	2056	50	0.0040055
GO:0016491	2810405K02Rik, Abp1, Adh6a, Aldh1a3, Cdo1, Cybrd1, Cyp2c65, Cyp2s1, Cyp3a13, Cyp3a25, ...	oxidoreductase activity	28	680	17	0.00417661
GO:0001968	Ccdc80, Tnc	fibronectin binding	2	5	1	0.00550361
GO:0008131	Abp1, Maoa	amine oxidase activity	2	5	1	0.00550361
GO:0008083	Areg, Bmp7, Cxcl12, Ereg, Gdf10, Igf1, Il6, Ogn, Reg1	growth factor activity	9	136	4	0.0056683
GO:0003707	Hnf4a, Nr1h4, Nr5a2, Rarb, Vdr	steroid hormone receptor activity	5	48	2	0.0057641
GO:0004879	Hnf4a, Nr1h4, Nr5a2, Rarb, Vdr	ligand-dependent nuclear receptor activity	5	48	2	0.0057641
GO:0046906	Cubn, Cyp2s1, Cyp3a13, Cyp3a25, Cyp4f14, Cyp7b1, Gif, Ptgs2	tetrapyrrole binding	8	114	3	0.00630291
GO:0008233	Adamdec1, Adamts2, Capn6, Casp1, Cpn1, Ctsc, Ctsk, Ctss, Dpep1, Enpep, ...	peptidase activity	24	579	14	0.00712585
GO:0043167	Abp1, Adamdec1, Adamts2, Adh6a, Alb, Alpi, Antxr1, Anxa10, Anxa13, Anxa8, ...	ion binding	110	3700	90	0.00789693
GO:0070011	Adamdec1, Adamts2, Capn6, Casp1, Cpn1, Ctsc, Ctsk, Ctss, Dpep1, Enpep, ...	peptidase activity, acting on L-amino acid peptide	23	553	14	0.00801914
GO:0005021	Pdgfra, Pdgfrb	vascular endothelial growth factor receptor activi	2	6	1	0.00812439
GO:0016298	Aadac, Gpld1, Lpl, Pla2g12b, Pla2g2a, Pnliprp2	lipase activity	6	76	2	0.00993341
GO:0003824	2810405K02Rik, 4921517B04Rik, A4gnt, Aadac, Abat, Abcc3, Abcc9, Abcg2, Abcg5, Abp1, ...	catalytic activity	138	4830	117	0.0106024
GO:0046872	Abp1, Adamdec1, Adamts2, Adh6a, Alb, Alpi, Antxr1, Anxa10, Anxa13, Anxa8, ...	metal ion binding	107	3623	88	0.010767
GO:0031419	Cubn, Gif	cobalamin binding	2	7	1	0.011194
GO:0005544	Anxa10, Anxa13, Anxa8	calcium-dependent phospholipid binding	3	20	1	0.0116298
GO:0019200	Gne, Hkdc1, Pfkp	carbohydrate kinase activity	3	20	1	0.0116298
GO:0043169	Abp1, Adamdec1, Adamts2, Adh6a, Alb, Alpi, Antxr1, Anxa10, Anxa13, Anxa8, ...	cation binding	107	3652	88	0.0134942
GO:0001664	Ccl11, Ccl25, Ccl28, Ccl9, Cxcl12	G-protein-coupled receptor binding	5	59	2	0.0136071
GO:0008199	Ltf, Trf	ferric iron binding	2	8	1	0.0146894
GO:0016709	Cyp4f14, Cyp7b1, Fmo2	oxidoreductase activity, acting on paired donors,	3	22	1	0.015164
GO:0005126	Ccl11, Ccl25, Ccl28, Ccl9, Cxcl12, Il1rn, Il6, Tnfsf13b	cytokine receptor binding	8	134	4	0.0158305
GO:0022804	Abcc3, Abcc9, Atp10a, Atp1a2, Pdpn, Slc13a1, Slc26a3, Slc26a6, Slc38a4, Slc5a1, ...	active transmembrane transporter activity	13	284	7	0.0204988
GO:0043565	Cdx1, Creb3l2, Creb3l3, Creb3l4, Etv5, Foxc1, Hnf4a, Isx, Maf, Meis2, ...	sequence-specific DNA binding	19	474	12	0.0213344
GO:0008081	Enpp2, Gpld1, Pde2a, Pde4b, Prei4	phosphoric diester hydrolase activity	5	67	2	0.0224899
GO:0008271	Slc13a1, Slc26a3	secondary active sulfate transmembrane transporter	2	11	1	0.0275127
GO:0015116	Slc13a1, Slc26a3	sulfate transmembrane transporter activity	2	11	1	0.0275127
GO:0015250	Aqp5, Pdpn	water channel activity	2	11	1	0.0275127
GO:0016411	Dgat1, Mogat2	acylglycerol O-acyltransferase activity	2	11	1	0.0275127
GO:0005215	Abcc3, Abcc4, Abcc9, Apoa1, Aqp5, Atp10a, Atp1a2, Chrnb1, Clca3, Clca6, ...	transporter activity	33	969	24	0.0283636
GO:0003705	Foxc1, Hnf4a, Prox1	RNA polymerase II transcription factor activity, e	3	29	1	0.0318112
GO:0005372	Aqp5, Pdpn	water transporter activity	2	12	1	0.0324977
GO:0051183	Pdpn, Rbp4	vitamin transporter activity	2	12	1	0.0324977
GO:0004497	Cyp2c65, Cyp2s1, Cyp3a13, Cyp3a25, Cyp4f14, Cyp7b1, Fmo2	monooxygenase activity	7	127	4	0.0339503
GO:0016705	Cyp2s1, Cyp3a13, Cyp3a25, Cyp4f14, Cyp7b1, Fmo2, Ptgs2	oxidoreductase activity, acting on paired donors,	7	127	4	0.0339503
GO:0015103	Slc13a1, Slc26a3, Slc26a6	inorganic anion transmembrane transporter activity	3	30	1	0.0347327
GO:0016765	Gsta2, Gstm3, Gstm5, Mgst3	transferase activity, transferring alkyl or aryl (	4	52	2	0.0361502
GO:0004806	Lpl, Pnliprp2	triacylglycerol lipase activity	2	13	1	0.0378055
GO:0015380	Slc26a3, Slc26a6	anion exchanger activity	2	13	1	0.0378055
GO:0042562	Aldh1a3, Cdh13	hormone binding	2	13	1	0.0378055
GO:0008430	Dio2, Fabp1, Gpx3	selenium binding	3	32	1	0.0409757
GO:0015106	Slc26a3, Slc26a6	bicarbonate transmembrane transporter activity	2	14	1	0.0434178
GO:0015108	Slc26a3, Slc26a6	chloride transmembrane transporter activity	2	14	1	0.0434178
GO:0015301	Slc26a3, Slc26a6	anion:anion antiporter activity	2	14	1	0.0434178
GO:0050897	Cubn, Gif	cobalt ion binding	2	14	1	0.0434178
GO:0005529	Cd302, Clec2h, Itln1, Lgals1, Lgals2, Nptx2, Reg1, Reg3b, Zg16	sugar binding	9	193	5	0.044267
GO:0020037	Cyp2s1, Cyp3a13, Cyp3a25, Cyp4f14, Cyp7b1, Ptgs2	heme binding	6	107	3	0.0445474
GO:0005319	Apoa1, Atp10a, Mttp	lipid transporter activity	3	35	1	0.0513194
GO:0008374	Dgat1, Mogat2, Soat1	O-acyltransferase activity	3	35	1	0.0513194
GO:0015300	Slc26a3, Slc26a6, Slc9a3	solute:solute antiporter activity	3	35	1	0.0513194
GO:0070330	Cyp2s1, Cyp3a13, Cyp3a25	aromatase activity	3	35	1	0.0513194
GO:0005515	9030623C06Rik, Abi2, Apoa1, Areg, Arg2, Arnt2, Aspn, Atp1a2, Bex1, Bgn, ...	protein binding	142	5254	127	0.0543853
GO:0016712	Cyp2s1, Cyp3a13, Cyp3a25	oxidoreductase activity, acting on paired donors,	3	36	1	0.0550216
GO:0016788	Aadac, Acpp, Alpi, Ang4, Bche, Ces3, Ces5, Ces6, D230012E17Rik, Dusp10, ...	hydrolase activity, acting on ester bonds	22	635	16	0.0562241
GO:0003700	Arnt2, Arntl2, Cdx1, Creb3l2, Creb3l3, Creb3l4, Etv5, Foxc1, Hnf4a, Isx, ...	transcription factor activity	23	675	17	0.0600141
GO:0070851	Ereg, Il1rn, Il6	growth factor receptor binding	3	39	1	0.0668632
GO:0046943	Pdpn, Slc26a6, Slc6a20a, Slc7a9	carboxylic acid transmembrane transporter activity	4	64	2	0.0680637
GO:0005342	Pdpn, Slc26a6, Slc6a20a, Slc7a9	organic acid transmembrane transporter activity	4	65	2	0.071216
GO:0031404	Clca3, Clca6, Ctsc, Slc26a3	chloride ion binding	4	65	2	0.071216
GO:0022857	Abcc3, Abcc4, Abcc9, Aqp5, Atp10a, Atp1a2, Chrnb1, Clca3, Clca6, Gja1, ...	transmembrane transporter activity	25	762	19	0.0728946
GO:0005198	9030623C06Rik, Cldn15, Col12a1, Col1a1, Col1a2, Col3a1, Col4a1, Col4a2, Col5a1, Col5a2, ...	structural molecule activity	14	378	10	0.0740591
GO:0043168	Clca3, Clca6, Ctsc, Slc26a3	anion binding	4	66	2	0.0744418
GO:0005543	Anxa10, Anxa13, Anxa8, Itpr2, Vnn1	phospholipid binding	5	94	3	0.0763909
GO:0004623	Pla2g12b, Pla2g2a	phospholipase A2 activity	2	20	1	0.0825436
GO:0046983	Arnt2, Cadm1, Cdh13, Creb3l2, Creb3l3, Creb3l4, Nfe2l3, Ptpre, Robo1, Sox6	protein dimerization activity	10	251	7	0.0826404
GO:0008146	Sult1b1, Sult1c2, Sult1d1	sulfotransferase activity	3	44	2	0.0889089
GO:0015171	Pdpn, Slc6a20a, Slc7a9	amino acid transmembrane transporter activity	3	44	2	0.0889089
GO:0008509	Clca3, Clca6, Slc13a1, Slc26a3, Slc26a6, Slco2b1	anion transmembrane transporter activity	6	128	4	0.0889318
GO:0008483	Abat, Gpt2	transaminase activity	2	21	1	0.0898292
GO:0033764	Hsd11b1, Hsd17b2	steroid dehydrogenase activity, acting on the CH-O	2	21	1	0.0898292
GO:0008234	Capn6, Casp1, Ctsc, Ctsk, Ctss, Pycard	cysteine-type peptidase activity	6	129	4	0.09149
GO:0009055	Cyp2s1, Cyp3a13, Cyp3a25, Cyp4f14, Cyp7b1, Gulo, Maoa	electron carrier activity	7	161	4	0.0944491
GO:0004114	Pde2a, Pde4b	3',5'-cyclic-nucleotide phosphodiesterase activity	2	22	1	0.0972958
GO:0046915	Slc39a5, Slc40a1	transition metal ion transmembrane transporter act	2	22	1	0.0972958
GO:0005506	Cdo1, Cybrd1, Cyp2c65, Cyp2s1, Cyp3a13, Cyp3a25, Cyp4f14, Cyp7b1, Ltf, Ptgs2, ...	iron ion binding	12	327	8	0.0979989
GO:0004112	Pde2a, Pde4b	cyclic-nucleotide phosphodiesterase activity	2	23	1	0.10493
GO:0016849	Cd38, Gucy1a3	phosphorus-oxygen lyase activity	2	23	1	0.10493
GO:0015291	Slc13a1, Slc26a3, Slc26a6, Slc38a4, Slc5a1, Slc6a20a, Slc9a3	secondary active transmembrane transporter activit	7	166	4	0.106511
GO:0015297	Slc26a3, Slc26a6, Slc9a3	antiporter activity	3	49	2	0.113559
GO:0016782	Sult1b1, Sult1c2, Sult1d1	transferase activity, transferring sulfur-containi	3	51	2	0.124069
GO:0004601	Gpx3, Ptgs2	peroxidase activity	2	26	1	0.128721
GO:0016229	Hsd11b1, Hsd17b2	steroid dehydrogenase activity	2	26	1	0.128721
GO:0016620	Aldh1a3, Far2	oxidoreductase activity, acting on the aldehyde or	2	26	1	0.128721
GO:0016684	Gpx3, Ptgs2	oxidoreductase activity, acting on peroxide as acc	2	26	1	0.128721
GO:0019842	Abat, Cubn, Gif, Gpt2, Rbp4	vitamin binding	5	113	3	0.136905
GO:0016820	Abcc3, Abcc9, Atp10a, Atp1a2	hydrolase activity, acting on acid anhydrides, cat	4	83	2	0.139667
GO:0042626	Abcc3, Abcc9, Atp10a, Atp1a2	ATPase activity, coupled to transmembrane movement	4	83	2	0.139667
GO:0043492	Abcc3, Abcc9, Atp10a, Atp1a2	ATPase activity, coupled to movement of substances	4	84	3	0.144054
GO:0015082	Slc39a5, Slc40a1	di-, tri-valent inorganic cation transmembrane tra	2	28	1	0.145207
GO:0004620	Gpld1, Pla2g12b, Pla2g2a	phospholipase activity	3	56	2	0.151765
GO:0005275	Pdpn, Slc6a20a, Slc7a9	amine transmembrane transporter activity	3	56	2	0.151765
GO:0008235	Cpn1, Dpep1	metalloexopeptidase activity	2	30	1	0.162098
GO:0016769	Abat, Gpt2	transferase activity, transferring nitrogenous gro	2	30	1	0.162098
GO:0042578	Acpp, Alpi, Dusp10, Enpp2, Gpld1, Mtmr11, Pde2a, Pde4b, Prei4, Ptpre	phosphoric ester hydrolase activity	10	292	8	0.167926
GO:0015405	Abcc3, Abcc9, Atp10a, Atp1a2	P-P-bond-hydrolysis-driven transmembrane transport	4	92	3	0.180967
GO:0015399	Abcc3, Abcc9, Atp10a, Atp1a2	primary active transmembrane transporter activity	4	93	3	0.185787
GO:0008375	A4gnt, Mgat4c	acetylglucosaminyltransferase activity	2	34	1	0.196796
GO:0016209	Gpx3, Ptgs2	antioxidant activity	2	34	1	0.196796
GO:0022892	Apoa1, Aqp5, Atp10a, Atp1a2, Chrnb1, Clca3, Clca6, Itpr2, Kctd12, Mttp, ...	substrate-specific transporter activity	23	790	20	0.200191
GO:0016903	Aldh1a3, Far2	oxidoreductase activity, acting on the aldehyde or	2	35	1	0.205613
GO:0008194	A4gnt, B4galnt1, Mgat4c, Ugt2a3	UDP-glycosyltransferase activity	4	100	3	0.220612
GO:0031402	Atp1a2, Slc13a1, Slc38a4, Slc5a1	sodium ion binding	4	100	3	0.220612
GO:0008238	Cpn1, Dpep1, Enpep	exopeptidase activity	3	68	2	0.224617
GO:0022891	Aqp5, Atp10a, Atp1a2, Chrnb1, Clca3, Clca6, Itpr2, Kctd12, Pdpn, Slc13a1, ...	substrate-specific transmembrane transporter activ	20	691	17	0.227914
GO:0005516	Camk1d, Mylk, Myo1a, Myo7a	calmodulin binding	4	106	3	0.251711
GO:0015370	Slc5a1, Slc6a20a	solute:sodium symporter activity	2	41	1	0.259149
GO:0016614	2810405K02Rik, Gulo, Hsd11b1, Hsd17b2	oxidoreductase activity, acting on CH-OH group of	4	114	3	0.294438
GO:0016746	Dgat1, Elovl6, Epb4.2, Mboat1, Mogat2, Soat1	transferase activity, transferring acyl groups	6	187	5	0.295371
GO:0048037	Abat, Abp1, Aldh1a3, Fmo2, Gpt2, Gulo	cofactor binding	6	187	5	0.295371
GO:0022890	Atp1a2, Slc39a5, Slc40a1, Slc9a3	inorganic cation transmembrane transporter activit	4	116	3	0.305274
GO:0046982	Arnt2, Robo1, Sox6	protein heterodimerization activity	3	81	2	0.309232
GO:0015293	Slc13a1, Slc38a4, Slc5a1, Slc6a20a	symporter activity	4	117	3	0.310708
GO:0015075	Atp10a, Atp1a2, Chrnb1, Clca3, Clca6, Itpr2, Kctd12, Slc13a1, Slc26a3, Slc26a6, ...	ion transmembrane transporter activity	17	615	15	0.312994
GO:0019887	Cdkn1c, Rapgef3	protein kinase regulator activity	2	48	2	0.321728
GO:0015662	Atp10a, Atp1a2	ATPase activity, coupled to transmembrane movement	2	50	2	0.339412
GO:0030170	Abat, Gpt2	pyridoxal phosphate binding	2	50	2	0.339412
GO:0070279	Abat, Gpt2	vitamin B6 binding	2	50	2	0.339412
GO:0000287	Alpi, Atp10a, Atp1a2, Cds1, Ephx2, Fmo2, Itga1, Mylk, Pfkp, Slc41a1, ...	magnesium ion binding	11	398	10	0.362723
GO:0004896	Il1rl1, Prlr	cytokine receptor activity	2	54	2	0.37432
GO:0005496	Abat, Gpt2, Hnf4a	steroid binding	3	92	3	0.381703
GO:0004714	Pdgfra, Pdgfrb	transmembrane receptor protein tyrosine kinase act	2	55	2	0.382934
GO:0042802	Apoa1, Cadm1, Cdh13, Dnm1, Emilin1, Ptpre	identical protein binding	6	208	6	0.384767
GO:0003774	Dnm1, Myl7, Myo1a, Myo7a	motor activity	4	132	4	0.392681
GO:0035091	Itpr2, Vnn1	phosphoinositide binding	2	57	2	0.400003
GO:0003702	Foxc1, Hnf4a, Prox1	RNA polymerase II transcription factor activity	3	95	3	0.401243
GO:0015276	Chrnb1, Clca6, Itpr2	ligand-gated ion channel activity	3	97	3	0.414174
GO:0022834	Chrnb1, Clca6, Itpr2	ligand-gated channel activity	3	97	3	0.414174
GO:0015294	Slc5a1, Slc6a20a	solute:cation symporter activity	2	59	2	0.416849
GO:0019207	Cdkn1c, Rapgef3	kinase regulator activity	2	60	2	0.425182
GO:0042625	Atp10a, Atp1a2	ATPase activity, coupled to transmembrane movement	2	60	2	0.425182
GO:0050660	Fmo2, Gulo	FAD binding	2	60	2	0.425182
GO:0030234	C3, Cdkn1c, Clps, Mug1, Pycard, Rapgef3, Serpina3n, Serpinb11, Serpinb1a, Serpine2, ...	enzyme regulator activity	16	622	15	0.428125
GO:0016747	Dgat1, Elovl6, Mboat1, Mogat2, Soat1	transferase activity, transferring acyl groups oth	5	181	5	0.44126
GO:0005254	Clca3, Clca6	chloride channel activity	2	62	2	0.441659
GO:0032403	Fcgrt, Grb10	protein complex binding	2	62	2	0.441659
GO:0003779	Capg, Coro2a, FHOS2, Limch1, Mylk, Myo1a, Myo7a	actin binding	7	262	7	0.443231
GO:0016829	Aldob, Car13, Cd38, Gucy1a3	lyase activity	4	142	4	0.446665
GO:0016616	2810405K02Rik, Hsd11b1, Hsd17b2	oxidoreductase activity, acting on the CH-OH group	3	103	3	0.452387
GO:0016887	Abcc3, Abcc9, Abcg2, Abcg5, Atp10a, Atp1a2	ATPase activity	6	224	6	0.453218
GO:0004252	Hp, Htra1, Klk1, Prss12	serine-type endopeptidase activity	4	145	4	0.462589
GO:0016758	A4gnt, B4galnt1, Mgat4c, Ugt2a3	transferase activity, transferring hexosyl groups	4	146	4	0.467862
GO:0016702	Cdo1, Ptgs2	oxidoreductase activity, acting on single donors w	2	66	2	0.473811
GO:0051213	Cdo1, Ptgs2	dioxygenase activity	2	66	2	0.473811
GO:0030528	Arnt2, Arntl2, Cdx1, Creb3l2, Creb3l3, Creb3l4, Etv5, Foxc1, Hnf4a, Id4, ...	transcription regulator activity	26	1053	26	0.474687
GO:0005253	Clca3, Clca6	anion channel activity	2	67	2	0.481674
GO:0016701	Cdo1, Ptgs2	oxidoreductase activity, acting on single donors w	2	67	2	0.481674
GO:0019199	Pdgfra, Pdgfrb	transmembrane receptor protein kinase activity	2	68	2	0.489463
GO:0031406	Fabp1, Otc	carboxylic acid binding	2	68	2	0.489463
GO:0046914	Abp1, Adamdec1, Adamts2, Adh6a, Alb, Alpi, Arg2, Car13, Cblb, Cdo1, ...	transition metal ion binding	58	2396	58	0.501629
GO:0008236	Hp, Htra1, Klk1, Ltf, Prss12	serine-type peptidase activity	5	196	5	0.510579
GO:0017171	Hp, Htra1, Klk1, Ltf, Prss12	serine hydrolase activity	5	197	5	0.515084
GO:0016462	Abcc3, Abcc9, Abcg2, Abcg5, Atp10a, Atp1a2, Chd6, Dnm1, Enpp2, Irgm2, ...	pyrophosphatase activity	14	576	14	0.523014
GO:0016818	Abcc3, Abcc9, Abcg2, Abcg5, Atp10a, Atp1a2, Chd6, Dnm1, Enpp2, Irgm2, ...	hydrolase activity, acting on acid anhydrides, in	14	579	14	0.530936
GO:0016817	Abcc3, Abcc9, Abcg2, Abcg5, Atp10a, Atp1a2, Chd6, Dnm1, Enpp2, Irgm2, ...	hydrolase activity, acting on acid anhydrides	14	581	14	0.536196
GO:0015077	Atp1a2, Slc9a3	monovalent inorganic cation transmembrane transpor	2	80	2	0.576966
GO:0019955	Il1rl1, Prlr	cytokine binding	2	83	2	0.59706
